# Supplementary material for: Modular Screening Reveals Driver Induced Additive Mechanisms of Baicalin and Jasminoidin on Cerebral Ischemia Therapy
Source: Front Cardiovasc Med. 2022 Feb 21;9:813983. doi: 10.3389/fcvm.2022.813983 (PMC8899124; doi:10.3389/fcvm.2022.813983)
Supplement: Supplementary Table 4 — The expression level of DEGs in Jasminoidin (JA) group and its corresponding modules. [file Table_4.csv]

NameID	B3-5	B3-6	B3-10	GB.accession	UniGene.ID	gene-symbol	Module color	Module ID
ROMO1	0.444	0.6746	0.8642	NM_025946	27477	2010100O12Rik	black	JA-Mod-1
SLC22A1	0.39	0.7285	0.9658	NM_009202	594	Slc22a1	black	JA-Mod-1
RUNDC3A	2.12	1.5542	0.9465	NM_016759	2560	Rap2ip	black	JA-Mod-1
TAGLN2	0.48	0.7655	1.0024	AF149291	22632	Tagln2	black	JA-Mod-1
UBE2H	2.75	1.5609	0.488	AK005179	5203	1500009C23Rik	black	JA-Mod-1
HSP90AA1	2.09	1.439	1.0215	AK004658	1843	Hsp86-1	black	JA-Mod-1
ZFR	3.21	2.1636	1.5362	NM_011767	21515	Zfr	black	JA-Mod-1
FOSB	0.433	0.3384	0.2614	NM_008036	26091	Fosb	black	JA-Mod-1
EGR2	0.399	0.2521	0.1615	X06746	1353	Egr2	black	JA-Mod-1
HDDC2	0.491	0.729	0.9579	AK009957	21078	2310057G13Rik	black	JA-Mod-1
ISCA2	0.487	0.7278	0.9929	BC022589	25719	0710001C05Rik	black	JA-Mod-1
SLC13A3	2.45	1.5119	0.9221	NM_054055	27473	Slc13a3	black	JA-Mod-1
IMP3	0.453	0.6711	0.8364	BC009145	12864	AI256594	black	JA-Mod-1
AP2A2	2.63	2.0067	1.4105	NM_007459	14555	Ap2a2	black	JA-Mod-1
6230425C21Rik	2.35	1.6808	0.9544	AK018097	3085	6230425C21Rik	black	JA-Mod-1
KHDRBS1	2.48	1.8472	1.4255	NM_011317	8256	Sam68	black	JA-Mod-1
Cyp4f15	0.486	0.8235	1.0238	AF233645	26539	AI787289	black	JA-Mod-1
Neurl1a	2.32	1.3278	0.7139	AF401228	103587	Neurl	black	JA-Mod-1
SPHKAP	2.49	1.8846	1.4661	AK019735	154303	4930544G21Rik	black	JA-Mod-1
CAMK2N2	2.32	1.4445	0.8969	AK013788	31199	2900075A18Rik	black	JA-Mod-1
RAB31	2.05	1.6752	1.304	BC013063	29274	1700093E07Rik	black	JA-Mod-1
EMSY	2.14	1.3461	0.6795	AK009395	86724	2310016L09Rik	black	JA-Mod-1
CORO1C	0.488	0.6077	0.6846	BC019444	200372	Coro1c	black	JA-Mod-1
INO80	2.04	1.6066	1.2284	NM_026574	89148	4632409L19Rik	black	JA-Mod-1
SRPK2	2.84	2.0809	1.2264	AK014004	200308		black	JA-Mod-1
CAT	2.24	0.8374	1.1761	NM_009804	4215	Cas1	blue	JA-Mod-2
FGFR3	0.437	1.5666	1.2675	M81342	6904	Fgfr3	blue	JA-Mod-2
IFT122	0.282	1.0866	0.9065	AF296075	9638	Wdr10	blue	JA-Mod-2
DACH1	0.94	2.1463	1.8894	NM_007826	12885	Dach1	blue	JA-Mod-2
DKKL1	0.407	1.1592	0.9576	NM_015789	27287	Sgy1-pending	blue	JA-Mod-2
XRCC5	0.276	1.2102	0.9579	X66323	2627	Xrcc5	blue	JA-Mod-2
GOLGA4	2.08	0.6239	0.9204	NM_018748	10409	Golga4	blue	JA-Mod-2
DCTN2	2.09	0.7557	0.9891	BC004613	22597	2310042E05Rik	blue	JA-Mod-2
MEF2C	2.19	0.9208	1.1561	NM_025282	24001	Mef2c	blue	JA-Mod-2
PDCD2	0.452	1.2742	1.0031	NM_008799	323	Pdcd2	blue	JA-Mod-2
DPP3	0.446	0.9159	0.7868	BC004600	22369	4930533O14Rik	blue	JA-Mod-2
MCL1	0.5	1.2646	1.1281	NM_008562	1639	Mcl1	blue	JA-Mod-2
VDAC1	2.86	0.7177	1.1956	NM_011694	3555	Vdac1	blue	JA-Mod-2
DNAJB1	0.24	0.4919	0.4467	NM_018808	2982	Dnajb1	blue	JA-Mod-2
SNRPA1	0.435	0.9152	0.829	NM_021336	821	Snrpa1	blue	JA-Mod-2
ENO2	2.11	0.7047	0.989	NM_013509	3913	Eno2	blue	JA-Mod-2
Tgtp1	2.28	0.549	0.9908	NM_011579	15793	Tgtp	blue	JA-Mod-2
TMED2	2.53	0.6327	1.2522	AK007569	21507	1810020N21Rik	blue	JA-Mod-2
rcor2	0.446	1.2133	1.0213	NM_054048	22980	Rcor	blue	JA-Mod-2
AKT2	2.5	0.9624	1.313	AK010511	8901	2410016A19Rik	blue	JA-Mod-2
CFLAR	2.37	1.5632	1.8129	BC023121	11778	AU021929	blue	JA-Mod-2
ZFAND5	2.09	0.818	1.1769	NM_009551	2904	Zfp216	blue	JA-Mod-2
PRKCQ	0.484	1.3312	1.1261	NM_008859	2921	Prkcq	blue	JA-Mod-2
NNT	2.41	0.7462	1.1665	NM_008710	3842	Nnt	blue	JA-Mod-2
RAB40B	3.02	0.6341	1.3357	AF425643	24511		blue	JA-Mod-2
ROBO4	0.392	1.7327	1.3979	AK004723	27782	1200012D01Rik	blue	JA-Mod-2
X61497	2.11	1.1697	1.4197	NM_020555	1348	X61497	blue	JA-Mod-2
Tac2	1.12	0.4607	0.6874	NM_009312	2374	Tac2	blue	JA-Mod-2
HIBADH	2.32	0.8072	1.2476	BC003914	4290	1110020G17Rik	blue	JA-Mod-2
TMEM168	0.372	1.3528	1.0288	BC007160	4511	8430437G11Rik	blue	JA-Mod-2
WBP4	0.928	2.1416	1.7388	NM_018765	20938	Wbp4	blue	JA-Mod-2
SPATA5	0.48	1.1918	1.053	NM_021343	25633	Spaf-pending	blue	JA-Mod-2
CRYM	2.35	0.6741	0.9907	NM_016669	9114	Crym	blue	JA-Mod-2
DBP	2.34	1.0304	1.2325	NM_016974	3459	Dbp	blue	JA-Mod-2
NPTX1	2.11	0.8772	1.1984	NM_008730	5142	Nptx1	blue	JA-Mod-2
MBD1	0.451	0.8533	0.7333	NM_013594	22522	Mbd1	blue	JA-Mod-2
PPP2CA	2.31	0.7909	1.1559	NM_019411	11711	Ppp2ca	blue	JA-Mod-2
2210419D22Rik	4.56	0.7513	1.545	AK008985	886	2210419D22Rik	blue	JA-Mod-2
HN1	2.08	0.5062	1.0181	NM_008258	1775	Hn1	blue	JA-Mod-2
TYRO3	2.01	0.6924	0.9952	U18343	2901	Tyro3	blue	JA-Mod-2
RNF19B	2.15	0.505	0.9485	AK015966	19126	4930534K13Rik	blue	JA-Mod-2
ELOVL6	2.54	1.1737	1.5639	NM_130450	26171	C77826	blue	JA-Mod-2
RNF130	0.394	0.9854	0.8315	NM_021540	27693	G1rzfp-pending	blue	JA-Mod-2
PSMG1	0.447	1.0688	0.909	NM_019537	27746	Dscr2	blue	JA-Mod-2
SERPINE1	0.371	0.4386	0.4199	NM_008871	1263	Serpine1	blue	JA-Mod-2
HSD17B4	0.428	1.2649	1.13	NM_008292	3195	Hsd17b4	blue	JA-Mod-2
DOHH	0.407	1.141	0.9249	AK004052	4022	1110033C18Rik	blue	JA-Mod-2
Zfp105	0.399	1.3781	1.2264	NM_009544	20430	Zfp105	blue	JA-Mod-2
RPRM	0.999	0.4933	0.5845	NM_023396	27086	2410012A13Rik	blue	JA-Mod-2
1810009A15Rik	0.411	1.1405	0.946	NM_025463	1915	1810009A15Rik	blue	JA-Mod-2
SMPD1	2.65	0.8839	1.3217	NM_011421	4628	Smpd1	blue	JA-Mod-2
PFKFB3	0.432	0.9169	0.799	AF294617	19669		blue	JA-Mod-2
CEP19	0.443	1.5743	1.3157	NM_025892	22990	1500031L02Rik	blue	JA-Mod-2
VWA1	1.54	0.4865	0.7383	AY030094	26515		blue	JA-Mod-2
CCSER2	2.25	0.865	1.1553	BC020073	27621	AI035535	blue	JA-Mod-2
CD34	1.71	0.4643	0.793	BC006607	29798	AU040960	blue	JA-Mod-2
GMEB1	0.463	1.1933	0.9718	AK004214	30911	1110050A04Rik	blue	JA-Mod-2
DEK	2.12	0.8312	1.2834	AK007546	28343	1810019E15Rik	blue	JA-Mod-2
PDGFC	0.433	1.1239	1.0173	NM_019971	40268	Pdgfc	blue	JA-Mod-2
TEKT5	2.01	0.7827	0.979	AK014352	142181	3300001K11Rik	blue	JA-Mod-2
laptm4a	2.05	0.5979	0.9683	NM_008640	30071	Laptm4a	blue	JA-Mod-2
NACC2	2.27	0.6178	1.1193	AK003878	131074	C030048H19Rik	blue	JA-Mod-2
B230219D22Rik	2	1.7183	1.8148	AK021008	155099	B230219D22Rik	blue	JA-Mod-2
PCBP3	2.1	0.3934	0.8698	NM_021568	143816	Pcbp3	blue	JA-Mod-2
CREB1	2.56	1.2106	1.6728	AK014391	29047	3526402H21Rik	blue	JA-Mod-2
EBNA1BP2	0.404	1.2718	1.1194	AK007491	29906	Ebp2	blue	JA-Mod-2
FBXL20	1.76	0.4661	0.8263	AK012109	31447	2610511F20Rik	blue	JA-Mod-2
ADGRA1	0.491	1.0026	0.8495	AK019347	39863	2900059M17Rik	blue	JA-Mod-2
LZTFL1	0.454	2.309	1.8939	AK018072	39928	6130400H19Rik	blue	JA-Mod-2
Tcl1b2	0.462	0.9967	0.8128	NM_013775	103653	Tcl1b2	blue	JA-Mod-2
TIMM44	0.372	0.2913	0.3049	U69898	142257	Timm44	blue	JA-Mod-2
B3GALNT1	2.1	0.7716	1.2036	NM_020026	153710	B3galt3	blue	JA-Mod-2
TEX2	2.21	0.6944	1.1982	X99253	28253		blue	JA-Mod-2
GLRX5	0.476	1.1425	0.9143	AK013761	29128	2900070E19Rik	blue	JA-Mod-2
ERP29	2.15	0.9829	1.181	BC017125	154570	Erp29	blue	JA-Mod-2
LMO4	2.53	0.5869	1.1912	NM_010723	29187	Lmo4	blue	JA-Mod-2
MYO18A	2.02	0.7719	1.143	AB026497	29351	Tiaf1	blue	JA-Mod-2
Timm8a1	0.406	1.2308	1.0087	NM_013898	30034	Timm8a	blue	JA-Mod-2
TACC1	2.91	0.9805	1.2808	AK019530	150176	4833447E04Rik	blue	JA-Mod-2
PIM3	1.93	0.3915	0.6807	BC017621	30018		blue	JA-Mod-2
DDX17	1.82	0.487	0.9216	AK011338	181538	2610007K22Rik	blue	JA-Mod-2
SH3BGRL	2.85	0.8626	1.2458	NM_019989	196451	Sh3bgrl	blue	JA-Mod-2
DDX25	2.46	0.7114	1.0342	NM_013932	45108	Ddx25	blue	JA-Mod-2
RNFT1	1.75	0.4973	0.8254	AK002624	182061	0610013E23Rik	blue	JA-Mod-2
HNRNPA3	2.08	0.8631	1.072	AK012090	206778	2610510D13Rik	blue	JA-Mod-2
NUTF2	2.34	0.8399	1.1515	BC003955	196148	2700067I02Rik	blue	JA-Mod-2
EML4	2.1	0.8252	1.092	AK019611	87700	4930443C24Rik	blue	JA-Mod-2
ANAPC5	2.22	0.7768	1.0141	NM_021505	45312	Anapc5	blue	JA-Mod-2
PGS1	0.479	0.9507	0.8496	BC022918	218718		blue	JA-Mod-2
FNDC5	0.432	0.9727	0.8316	AK005096	44075	1500001L03Rik	blue	JA-Mod-2
VPS36	0.442	1.2662	1.0665	BC010811	41453		blue	JA-Mod-2
SYT7	0.475	0.9968	0.916	NM_018801	88819	Syt7	blue	JA-Mod-2
CARD19	2.33	0.8808	1.5106	AK003526	3336	1110007C09Rik	brown	JA-Mod-3
CLK2	0.938	2.2342	1.5453	NM_007712	18268	Clk2	brown	JA-Mod-3
CPEB1	1.42	0.2863	0.911	NM_007755	22062	Cpeb	brown	JA-Mod-3
GZMM	2.23	0.6415	1.2513	NM_008504	22302	Gzmm	brown	JA-Mod-3
SMIM10L1	2.3	0.9968	1.5792	AK005205	608	2700089E24Rik	brown	JA-Mod-3
sfmbt1	0.889	2.1945	1.5523	AK020390	10061	9330180L21Rik	brown	JA-Mod-3
ALOX12B	0.459	1.1691	0.7622	NM_009659	10143	Alox12b	brown	JA-Mod-3
KCNJ12	1.38	2.2667	1.7524	NM_010603	4970	Kcnj12	brown	JA-Mod-3
BLNK	0.373	1.6327	1.0959	Y17159	9749	Ly57	brown	JA-Mod-3
dsn1	0.494	1.3616	0.8668	NM_025853	25410	1700022L09Rik	brown	JA-Mod-3
GTF2B	0.373	0.8749	0.6899	BC016637	27213		brown	JA-Mod-3
Rps4l	0.392	1.073	0.7869	AK004068	3572	1110033J19Rik	brown	JA-Mod-3
Nrbf2	0.464	1.3193	0.9043	NM_025307	21209	Nrbf2	brown	JA-Mod-3
BZW1	2.06	0.9421	1.5025	NM_025824	21848	1200015E15Rik	brown	JA-Mod-3
GPR153	2.21	0.8165	1.3514	AK004377	23235	1110065N12Rik	brown	JA-Mod-3
DUSP6	0.193	0.4717	0.3369	NM_026268	1791	Dusp6	brown	JA-Mod-3
MOBP	2.04	1.2676	1.6985	AK013799	3915	Mobp	brown	JA-Mod-3
LIMD1	0.507	2.674	1.5136	NM_013860	10987	Limd1	brown	JA-Mod-3
ZFAND2A	0.449	1.2283	0.8042	AF224494	24521		brown	JA-Mod-3
TFRC	2.76	0.8979	1.841	NM_011638	26069	Trfr	brown	JA-Mod-3
NR1D2	2.87	0.7384	1.622	NM_011584	26587	Thra	brown	JA-Mod-3
TMEM51	0.424	1.1142	0.8457	BC003277	27587		brown	JA-Mod-3
SOX11	0.357	1.2245	0.7927	NM_009234	6238	Sox11	brown	JA-Mod-3
MIOS	0.416	1.8717	1.212	BC020002	21695	C81488	brown	JA-Mod-3
HSPA4	0.214	1.0441	0.7132	NM_008300	1032	Hspa4	brown	JA-Mod-3
KMT2E	0.463	1.7631	1.092	AK021284	10878	D230038D11Rik	brown	JA-Mod-3
5730508B09Rik	0.427	1.3297	0.8778	AK017758	22765	5730508B09Rik	brown	JA-Mod-3
LUC7L2	0.447	1.1199	0.8738	AF318301	24304		brown	JA-Mod-3
SNX16	2.09	0.8639	1.3568	AK015872	27678	4930522N22Rik	brown	JA-Mod-3
ARHGDIG	1.54	0.4007	0.9959	NM_008113	1383	Arhgdig	brown	JA-Mod-3
COPS7A	1.51	0.4709	0.8739	NM_012003	1444	Cops7a	brown	JA-Mod-3
ARRDC2	0.449	2.2828	1.5507	AK014582	24215	4632416I05Rik	brown	JA-Mod-3
MAPKBP1	0.44	1.2954	0.9033	AK013436	25540	2810483F24Rik	brown	JA-Mod-3
KPNA3	1.43	3.8018	2.7538	NM_008466	25548	Kpna3	brown	JA-Mod-3
AKAP12	1.8	0.4549	0.9695	NM_031185	27481	Akap12	brown	JA-Mod-3
RARS	2	0.6092	1.1708	AK011383	27526	2610011N19Rik	brown	JA-Mod-3
E2F5	1.17	2.2107	1.7135	NM_007892	379	E2f5	brown	JA-Mod-3
TNFAIP8L1	0.473	2.4709	1.4968	NM_025566	2312	2600017J23Rik	brown	JA-Mod-3
KIF5B	2.36	0.7605	1.3377	NM_008448	3380	Kif5b	brown	JA-Mod-3
ADCYAP1	0.712	0.3092	0.4607	D14716	3407	Adcyap1	brown	JA-Mod-3
KLF4	0.353	0.7172	0.5445	NM_010637	4325	Klf4	brown	JA-Mod-3
SURF1	1.24	0.4718	0.8337	NM_013677	6874	Surf1	brown	JA-Mod-3
4930453N24Rik	0.494	1.3043	0.9281	AK002578	23682	4930453N24Rik	brown	JA-Mod-3
ALPK3	0.389	2.1799	1.3265	NM_054085	25139	Midori-pending	brown	JA-Mod-3
TMEM39A	0.386	0.9349	0.6201	NM_026407	27134	2610033C09Rik	brown	JA-Mod-3
GABRR1	1.57	4.5889	3.2907	NM_008075	14116	Gabrr1	brown	JA-Mod-3
MATR3	2.7	1.1647	1.9271	NM_010771	25575	Matr3	brown	JA-Mod-3
WDR70	0.429	1.0182	0.7633	AK014750	27436	4833422F06Rik	brown	JA-Mod-3
HOXB1	1.21	2.0551	1.7216	AK017686	890	Hoxb1	brown	JA-Mod-3
IFIT3	1.45	0.3694	0.957	NM_010501	951	Ifit3	brown	JA-Mod-3
CELF1	0.85	0.4816	0.6932	AK014492	7526	Cugbp1	brown	JA-Mod-3
DIAPH2	0.453	1.6056	1.1138	Y15910	10763	Diap2	brown	JA-Mod-3
SIGMAR1	1.51	0.475	0.9651	NM_011014	22745	Oprs1	brown	JA-Mod-3
COL17A1	0.498	1.3109	0.8644	NM_007732	1225	Col17a1	brown	JA-Mod-3
Ckmt1	1.59	0.4068	0.955	NM_009897	970	Ckmt1	brown	JA-Mod-3
SLC4A2	1.59	0.4471	0.8664	NM_009207	4580	Slc4a2	brown	JA-Mod-3
CNP	2.38	0.7972	1.467	NM_009923	15711	Cnp1	brown	JA-Mod-3
FBXL15	0.461	1.5402	0.9537	BC016499	19973	0710008C12Rik	brown	JA-Mod-3
PPP2R1B	0.461	0.3562	0.4109	AK010754	21428	2410091N08Rik	brown	JA-Mod-3
ARV1	0.463	0.964	0.7305	AK004398	22779	1110067L22Rik	brown	JA-Mod-3
TMEM261	0.467	1.6218	1.0629	NM_025849	24332	3110001D03Rik	brown	JA-Mod-3
GFPT2	0.724	2.0907	1.4536	NM_013529	24402	Gfpt2	brown	JA-Mod-3
PLXDC1	0.419	1.7282	1.1733	AF378760	39617	2410003I07Rik	brown	JA-Mod-3
TTC28	0.424	0.9769	0.7534	NM_024477	102093	BC002262	brown	JA-Mod-3
BC006049	0.435	1.0372	0.7229	BC006049	153276		brown	JA-Mod-3
nkx6-2	0.485	1.088	0.8464	AK008173	28308	Nkx6-2	brown	JA-Mod-3
DYRK3	0.344	1.4476	0.9464	BC006704	39299		brown	JA-Mod-3
1700030K09Rik	0.421	1.0084	0.7248	BC008558	39967		brown	JA-Mod-3
FKBP5	2.25	0.9294	1.6758	NM_010220	154390	Fkbp5	brown	JA-Mod-3
MYT1L	2.71	0.9829	1.6784	AK013847	154491	2900093J19Rik	brown	JA-Mod-3
Zfp521	0.48	1.0687	0.8392	BC021376	40325		brown	JA-Mod-3
CASC3	1.64	0.4447	0.9434	AJ292072	40120	Bat3	brown	JA-Mod-3
KCNIP1	1.21	0.446	0.8167	NM_027398	39745	Kcnip1	brown	JA-Mod-3
EIF3I	0.466	1.1283	0.8873	NM_018799	104828	Eif3s2	brown	JA-Mod-3
AVPI1	0.48	1.0479	0.8418	AK009243	30060	2310008N12Rik	brown	JA-Mod-3
MAP7D2	0.488	1.5479	1.0497	AK005554	196463	1600028E09Rik	brown	JA-Mod-3
0610037L13Rik	0.431	1.2285	0.8348	BC019215	46638	0610037L13Rik	brown	JA-Mod-3
HSPA1A	0.135	0.2706	0.1931	M12571	196559	Hsp70-3	brown	JA-Mod-3
BLOC1S4	0.293	1.2448	0.8622	AK011795	46744	2610101N07Rik	brown	JA-Mod-3
SPG21	0.408	1.1388	0.8549	AK011985	206799	D9Wsu18e	brown	JA-Mod-3
TUBB2B	0.483	0.7766	0.6636	AK010786	200858	2410129E14Rik	brown	JA-Mod-3
CMTM5	1.3	0.4826	0.9303	AK013666	41614	2900052H21Rik	brown	JA-Mod-3
SPCS3	1.48	0.4811	0.898	BC019390	86437	1810011E08Rik	brown	JA-Mod-3
FBXO5	2.05	0.8745	1.3	AK011820	197520	Fbxo31	brown	JA-Mod-3
GRM3	0.101	1.446	0.894	AK002958	45836	Gprc1c	brown	JA-Mod-3
spdya	0.378	0.9001	0.6829	AK014910	75202	4921517J08Rik	brown	JA-Mod-3
PCDHB3	0.371	1.2557	0.7988	NM_053128	82308	Pcdhb3	brown	JA-Mod-3
HDHD3	0.401	1.5528	0.9488	AK013245	41506	2810435D12Rik	brown	JA-Mod-3
4933436F18Rik	0.821	2.0806	1.4828	AK017080	55874	4933436F18Rik	brown	JA-Mod-3
H2-DMb1	0.465	0.5666	0.9642	NM_010387	3322	H2-DMb1	cyan	JA-Mod-4
COL4A3BP	0.483	0.639	1.356	AK020301	24125	9230101K08Rik	cyan	JA-Mod-4
CCL5	0.718	0.6861	0.4837	NM_013653	3370	Scya5	cyan	JA-Mod-4
Cyp4v3	0.259	0.4751	1.4185	AK004724	1554	AU043077	cyan	JA-Mod-4
Ccl12	1.04	1.2383	2.5469	NM_011331	867	Scya12	cyan	JA-Mod-4
XRCC4	0.499	0.6123	1.3378	AB055154	37531	2310057B22Rik	cyan	JA-Mod-4
TBCE	0.431	0.5125	0.8974	AK011899	200507	Tbce	cyan	JA-Mod-4
gbp7	0.77	0.9872	2.2683	BC010229	45740		cyan	JA-Mod-4
RBP1	1.07	0.4116	0.8724	NM_011254	2450	Rbp1	green	JA-Mod-5
LMNA	0.429	0.8491	0.5623	AK004619	3438	Lmna	green	JA-Mod-5
CCND3	0.459	1.1185	0.6907	NM_007632	7417	Ccnd3	green	JA-Mod-5
SFRP1	0.869	0.3138	0.6609	NM_013834	3171	Sfrp1	green	JA-Mod-5
BPTF	0.5	1.6917	0.85	BC003956	26671		green	JA-Mod-5
HMGCL	0.388	1.77	0.8002	NM_008254	22668	Hmgcl	green	JA-Mod-5
CRY1	0.388	1.2656	0.6411	NM_007771	26237	Cry1	green	JA-Mod-5
APMAP	1.26	0.3858	0.9348	AJ310638	26599	2310001A20Rik	green	JA-Mod-5
ATP6V0A2	0.728	2.6038	1.284	NM_011596	1158	Tj6	green	JA-Mod-5
JUNB	0.432	0.247	0.3628	NM_008416	1167	Junb	green	JA-Mod-5
Zfp423	0.446	1.1048	0.6971	NM_033327	23452	Ebfaz	green	JA-Mod-5
NPRL2	1.32	0.4851	1.0721	NM_018879	11337	Nprl2-pending	green	JA-Mod-5
RHOT2	0.386	1.6956	0.8147	BC023163	19077		green	JA-Mod-5
PTEN	1.5	3.36	2.0347	NM_008960	1591	Pten	green	JA-Mod-5
ING1	0.467	1.2629	0.7874	AF177757	25709	Ing1	green	JA-Mod-5
VEGFC	0.498	1.029	0.6812	NM_009506	1402	Vegfc	green	JA-Mod-5
PPCS	0.452	1.3489	0.7848	NM_026494	27245	6330579B17Rik	green	JA-Mod-5
BNIP2	0.5	1.3442	0.7402	NM_016787	1561	Bnip2	green	JA-Mod-5
ARAF	1.34	0.4684	1.0257	AK004741	21868	Araf	green	JA-Mod-5
nfkbiz	0.359	0.6617	0.4518	NM_030612	3732	Mail-pending	green	JA-Mod-5
LIMS2	0.448	2.6504	1.1272	BC010816	24551		green	JA-Mod-5
EHBP1L1	0.39	1.8738	0.8194	NM_053252	23607	LOC114601	green	JA-Mod-5
CACNA2D1	1.44	2.3872	1.7424	NM_009784	30841	Cacna2d1	green	JA-Mod-5
TMCO1	0.483	1.2578	0.7933	BC020098	29049	1190006A08Rik	green	JA-Mod-5
SYMPK	0.459	1.6813	0.8981	AK019497	33799	4632415H16Rik	green	JA-Mod-5
Akr1e1	0.352	1.3993	0.7761	NM_018859	141365	Akr1e1	green	JA-Mod-5
ARPC5	0.475	1.0689	0.6525	NM_026369	29864	Arpc5	green	JA-Mod-5
CRLF3	0.441	1.1466	0.7097	NM_018776	33962	Crlf3	green	JA-Mod-5
GABARAPL2	0.952	0.4822	0.7679	NM_026693	30017	0610012F20Rik	green	JA-Mod-5
2900019E01Rik	0.636	2.033	1.1699	AK013555	154245	2900019E01Rik	green	JA-Mod-5
TSFM	2.15	0.3937	1.6676	AK020437	159898	9430024O13Rik	green	JA-Mod-5
NAA15	3.13	1.0853	2.3382	NM_053089	28256	Narg1-pending	green	JA-Mod-5
SLF1	1.47	2.0402	1.6209	BC009101	34198	AW545819	green	JA-Mod-5
ALDH1A2	1.32	0.4172	1.0475	NM_009022	42016	Aldh1a2	green	JA-Mod-5
SRF	0.88	0.469	0.7422	NM_020493	45044	Srf	green	JA-Mod-5
NELFA	0.394	1.5392	0.8254	AK019191	71361	Whsc2h	green	JA-Mod-5
MRM1	0.498	1.4522	0.8645	BC005625	63323		green	JA-Mod-5
HSPA13	0.373	1.6903	0.7771	AK005396	46007	1600002I10Rik	green	JA-Mod-5
4930423O20Rik	0.81	0.4711	0.6821	AK015192	195687	4930423O20Rik	green	JA-Mod-5
pprc1	0.488	1.4919	0.6559	BC013720	2415		greenyellow	JA-Mod-6
acsbg1	0.577	2.225	0.9612	NM_053178	20592	lpd	greenyellow	JA-Mod-6
dgcr6	0.836	0.3685	0.737	AK019346	27155	Dgcr6	greenyellow	JA-Mod-6
SSTR2	0.726	0.369	0.666	NM_009217	4375	Smstr2	greenyellow	JA-Mod-6
ADGRL4	0.471	1.2295	0.6533	AF385682	27242		greenyellow	JA-Mod-6
PQBP1	0.957	0.3869	0.8359	NM_019478	14616	Pqbp1	greenyellow	JA-Mod-6
PDGFRA	0.694	2.5946	1.0681	NM_011058	2924	Pdgfra	greenyellow	JA-Mod-6
RNF19A	0.604	2.0076	0.9285	NM_013923	5181	Rnf19	greenyellow	JA-Mod-6
CGA	0.0012	0.0094	0.0029	NM_009889	1361	Cga	greenyellow	JA-Mod-6
TTPA	0.587	3.4417	1.2225	AK004882	24375	Ttpa	greenyellow	JA-Mod-6
CLDN5	0.427	1.5256	0.6739	NM_013805	22768	Cldn5	greenyellow	JA-Mod-6
ANAPC15	1.34	0.4364	1.1727	AK018169	39906	6330414C15Rik	greenyellow	JA-Mod-6
CACNA1G	0.528	2.2077	0.8784	NM_009783	29585	Cacna1g	greenyellow	JA-Mod-6
GAL3ST1	0.908	2.37	1.1467	NM_016922	103414	Gcst	greenyellow	JA-Mod-6
CEP72	0.531	2.3793	0.8283	AK017134	196105	4933440J22Rik	greenyellow	JA-Mod-6
BDKRB1	0.618	2.4095	1.045	NM_007539	57076	Bdkrb	greenyellow	JA-Mod-6
SLF1	0.987	2.7297	1.3489	AK012253	44754	2700017A04Rik	greenyellow	JA-Mod-6
MLF1	0.48	0.3935	0.6223	NM_010801	10414	Mlf1	lightcyan	JA-Mod-7
NUDT19	0.597	0.7648	0.2866	NM_033080	27194	D7Rp2e	lightcyan	JA-Mod-7
FOS	0.28	0.3309	0.2051	NM_010234	5043	Fos	lightcyan	JA-Mod-7
Ly6f	0.744	0.43	1.3715	NM_008530	57179	Ly6f	lightcyan	JA-Mod-7
BCAP29	0.493	0.7923	1.4432	NM_007530	4236	Bcap29	magenta	JA-Mod-8
LRP5	0.479	0.777	1.1743	NM_008513	20876	Lrp5	magenta	JA-Mod-8
WFDC18	0.219	0.4439	0.7773	NM_007969	1650	Expi	magenta	JA-Mod-8
rsph1	2	1.5942	0.9524	NM_025290	12743	Tsga2	magenta	JA-Mod-8
Ctla2b	0.403	0.9723	1.7768	AY034578	22715	Ctla2b	magenta	JA-Mod-8
MCM6	2.04	2.0171	1.9584	NM_008567	4933	Mcmd6	magenta	JA-Mod-8
COPZ2	1.29	0.9382	0.4441	NM_019877	22144	Copz2	magenta	JA-Mod-8
CRYZ	1.02	1.3497	2.0632	S70056	3534	Cryz	magenta	JA-Mod-8
OXCT1	2.08	1.6665	1.1112	NM_024188	13445	Oxct	magenta	JA-Mod-8
PLIN2	0.473	0.6413	0.9446	NM_007408	381	Adfp	magenta	JA-Mod-8
COL6A1	0.739	0.5518	0.3096	NM_009933	2509	Col6a1	magenta	JA-Mod-8
EPB41L1	2.21	1.9135	1.1812	NM_013510	20852	Epb4.1l1	magenta	JA-Mod-8
RPP21	0.36	0.6753	1.1807	NM_026308	27131	0610037N01Rik	magenta	JA-Mod-8
GREM2	0.984	0.8181	0.4985	NM_011825	25760	Prdc-pending	magenta	JA-Mod-8
TMEM161B	0.771	0.6619	0.4992	AK013305	33424	2810446P07Rik	magenta	JA-Mod-8
TEX261	2.08	1.6016	0.9392	AK013971	28371	3110001O07Rik	magenta	JA-Mod-8
CDH10	0.419	0.6312	0.9747	AK021064	159897	C030011H18Rik	magenta	JA-Mod-8
2900084O13Rik	0.37	0.4889	0.8227	AK013822	158938	2900084O13Rik	magenta	JA-Mod-8
4930528D03Rik	0.796	1.4474	2.2438	AK015923	159469	4930528D03Rik	magenta	JA-Mod-8
NINJ2	0.457	0.6255	0.8837	NM_016718	103668	Ninj2	magenta	JA-Mod-8
Pcdhb21	0.453	0.6718	0.9529	NM_053146	196828	Pcdhb21	magenta	JA-Mod-8
GH	0.0373	0.0367	0.0437	NM_008117	1240	Gh	midnightblue	JA-Mod-9
Copg2os2	1.4	1.3134	3.0835	U20264	22891	Copg2as2	midnightblue	JA-Mod-9
2010103A03Rik	0.688	0.7658	3.2058	AK008302	24082	2010103A03Rik	midnightblue	JA-Mod-9
GGH	1.38	1.3394	2.3469	NM_010281	20461	Ggh	midnightblue	JA-Mod-9
2700089I24Rik	1.15	1.2084	0.4217	AK012591	158854	2700089I24Rik	midnightblue	JA-Mod-9
RBM3	0.947	0.3132	1.1161	NM_016809	2591	Rbm3	pink	JA-Mod-10
SYN2	0.421	0.7871	0.3333	NM_013681	20892	Syn2	pink	JA-Mod-10
PDPK1	2.03	2.8632	1.5612	NM_011062	10504	Pdpk1	pink	JA-Mod-10
LGALS3BP	0.636	0.3753	0.7387	NM_011150	3152	Ppicap	pink	JA-Mod-10
SLC4A1AP	0.688	0.4537	0.8395	AF035526	6259	Slc4a1ap	pink	JA-Mod-10
Ly6a	1.08	0.4932	1.2375	NM_010738	8180	Ly6a	pink	JA-Mod-10
CREM	0.403	1.0231	0.1144	NM_013498	5244	Crem	pink	JA-Mod-10
PPARGC1A	2.08	2.44	1.8868	NM_008904	10707	Ppargc1	pink	JA-Mod-10
PKIA	1.69	2.5163	1.2508	NM_008862	3193	Pkia	pink	JA-Mod-10
LYST	1.7	2.3425	1.3319	NM_010748	1423	Lyst	pink	JA-Mod-10
gk	1.87	3.0611	1.5873	NM_008194	3242	Gyk	pink	JA-Mod-10
GSTA4	0.788	0.4179	0.8824	NM_010357	2662	Gsta4	pink	JA-Mod-10
INHBA	0.507	0.3411	0.5928	NM_008380	8042	Inhba	pink	JA-Mod-10
Ngp	0.503	0.7554	0.4115	NM_008694	2827	Ngp	pink	JA-Mod-10
IDS	2.31	1.2376	2.8661	NM_010498	7973	Ids	pink	JA-Mod-10
PBX4	0.789	1.3321	0.4438	NM_030555	22961	Pbx4	pink	JA-Mod-10
Zfp106	1.61	2.067	1.4409	AF060246	27653	Zfp106	pink	JA-Mod-10
DLX2	0.728	1.3412	0.4728	NM_010054	3896	Dlx2	pink	JA-Mod-10
B4GALT6	1.41	2.3205	0.9516	NM_019737	26364	B4galt6	pink	JA-Mod-10
LRRC57	2.49	0.7843	3.0464	AK012637	27772	2810002D13Rik	pink	JA-Mod-10
DUSP4	0.323	0.1845	0.3808	AK012530	153803	2700078F24Rik	pink	JA-Mod-10
SCN2B	1.52	2.4721	1.1823	AK013326	156870	2810451E09Rik	pink	JA-Mod-10
spryd3	0.778	0.4463	0.9416	BC008150	29207		pink	JA-Mod-10
PRKAA2	2.4	3.7187	1.6364	AK009231	48638	2310008I11Rik	pink	JA-Mod-10
MED12	1.12	2.2461	0.9326	AF071310	20873	Tnrc11	purple	JA-Mod-11
RBM4	0.853	0.4331	0.9138	NM_009032	542	Rbm4	purple	JA-Mod-11
IFIT1	6.16	0.8871	6.8354	NM_008331	6718	Ifit1	purple	JA-Mod-11
MAX	0.964	0.4727	1.0571	NM_008558	3931	Max	purple	JA-Mod-11
UBE2E1	0.983	0.4874	1.0347	NM_009455	4429	Ube2e1	purple	JA-Mod-11
IFNAR1	1.07	2.6372	0.9584	NM_010508	502	Ifnar	purple	JA-Mod-11
STK11IP	0.535	1.036	0.4684	AK004757	3463	1200014D22Rik	purple	JA-Mod-11
CLINT1	1.26	2.4359	1.1453	BC004080	24036	AI642036	purple	JA-Mod-11
GAD2	1.31	2.9286	1.1409	NM_008078	4784	Gad2	purple	JA-Mod-11
CIAPIN1	0.663	0.4141	0.6996	BC016261	27582	AA617265	purple	JA-Mod-11
PAK1IP1	0.859	0.4445	0.9145	AF386076	24789	5930415H02Rik	purple	JA-Mod-11
GBP3	2.1	0.7391	2.3276	NM_018734	1909	Gbp3	purple	JA-Mod-11
NUB1	1.05	2.5035	0.8367	NM_016736	5856	Nyren18-pending	purple	JA-Mod-11
ZFYVE26	1.28	2.5597	1.0556	BC006654	28526		purple	JA-Mod-11
FAM132A	1.08	0.4942	1.1764	NM_026125	29140	1110035L05Rik	purple	JA-Mod-11
5033419P20Rik	1.01	2.4984	0.8158	BC003265	153618	5033419P20Rik	purple	JA-Mod-11
ATPIF1	0.712	2.0039	0.6255	AK011886	160330		purple	JA-Mod-11
KDM5A	1.23	2.3472	1.0343	BC010717	95879		purple	JA-Mod-11
EPHA4	1.31	2.2252	1.2345	AK013481	49646	2900005C20Rik	purple	JA-Mod-11
HMGB3	0.892	0.4373	0.8701	NM_008253	340	Hmgb3	red	JA-Mod-12
CCL3	0.185	0.4204	0.1959	NM_011337	1282	Scya3	red	JA-Mod-12
MDFIC	0.455	1.2139	0.433	U13371	1314	Kdt1	red	JA-Mod-12
CPD	0.942	2.2987	1.0989	NM_007754	20910	Cpd	red	JA-Mod-12
mthfd2	0.751	3.1947	1.0157	NM_008638	443	Mthfd2	red	JA-Mod-12
HK2	0.799	2.6096	0.7889	NM_013820	2549	Hk2	red	JA-Mod-12
TAF9	1.04	0.4846	1.015	NM_027139	16976	Taf9	red	JA-Mod-12
GRPR	1.5	2.8548	1.6714	NM_008177	4687	Grpr	red	JA-Mod-12
FRMD4B	0.856	2.3974	0.9278	AB042027	27789	C87375	red	JA-Mod-12
CTSH	0.773	0.3411	0.7691	NM_007801	2277	Ctsh	red	JA-Mod-12
LARGE1	1.24	2.3948	1.2019	NM_010687	20872	Large	red	JA-Mod-12
SYNGR1	0.476	1.4408	0.5132	NM_009303	10217	Syngr1	red	JA-Mod-12
TSR3	0.295	0.9269	0.3129	AK003675	18568	1110014B11Rik	red	JA-Mod-12
SCMH1	0.0774	3.204	0.0484	AB030906	18718	Scml1	red	JA-Mod-12
hspa1b	0.0795	0.2564	0.081	M12573	6388	Hsp70-1	red	JA-Mod-12
CLK1	0.764	0.2862	0.7364	NM_009905	1761	Clk	red	JA-Mod-12
HAP1	0.371	1.0179	0.3729	NM_010404	10717	Hap1	red	JA-Mod-12
Abcb1a	0.378	0.9658	0.4424	NM_011076	16086	Abcb1a	red	JA-Mod-12
Nxf7	1.49	2.762	1.5611	AJ305318	103373		red	JA-Mod-12
NPEPPS	1.13	2.1038	1.2375	NM_008942	29824	Psa	red	JA-Mod-12
PFDN5	0.843	0.3535	0.7906	NM_027044	158264	1700010A06Rik	red	JA-Mod-12
plekhb2	0.797	2.1677	0.8825	AF189817	28491	AU018239	red	JA-Mod-12
USE1	0.853	0.4518	0.8686	AF353245	41890	2010315L10Rik	red	JA-Mod-12
PRKG1	0.906	2.0657	0.9369	NM_011160	45826	Prkg1	red	JA-Mod-12
ERCC6L2	1.59	3.4668	1.7288	AK006112	45349	1700019D06Rik	red	JA-Mod-12
RNF150	0.684	2.2039	0.8228	AK021144	66737	C030044C12Rik	red	JA-Mod-12
GADD45G	0.317	0.2919	0.3937	NM_011817	9653	Gadd45g	salmon	JA-Mod-13
Rps3a1	1.16	0.7489	2.2551	NM_016959	6957	Rps3a	salmon	JA-Mod-13
SAA3	1.31	0.8473	3.3321	NM_011315	14277	Saa3	salmon	JA-Mod-13
PDLIM1	0.551	0.419	1.2288	NM_016861	5567	Pdlim1	salmon	JA-Mod-13
CYR61	0.424	0.4562	0.3055	NM_010516	1231	Cyr61	salmon	JA-Mod-13
ARL4D	0.532	0.5669	0.3746	NM_025404	5376	1110036H21Rik	salmon	JA-Mod-13
RB1	1.83	2.0279	1.1752	NM_009029	304	Rb1	salmon	JA-Mod-13
POMC	0.127	0.1394	0.0693	NM_008895	21878	Pomc1	salmon	JA-Mod-13
CARTPT	0.545	0.4524	0.8948	NM_013732	19956	Cart-pending	salmon	JA-Mod-13
C030011L09Rik	0.582	0.4469	1.1876	AK021067	126426	C030011L09Rik	salmon	JA-Mod-13
PLXNA2	2.07	2.412	1.233	AK013176	33582	2810428A13Rik	salmon	JA-Mod-13
C1D	1.33	0.539	2.0393	NM_020558	2485	C1d-pending	tan	JA-Mod-14
GTF2I	1.51	2.0455	0.9164	NM_010365	22593	Gtf2i	tan	JA-Mod-14
AMPD3	1.7	2.2335	1.1305	D85596	3238	Ampd3	tan	JA-Mod-14
EIF2S3Y	1.41	0.7991	2.034	NM_012011	20831	Eif2s3y	tan	JA-Mod-14
DLX5	1.3	2.067	0.5886	NM_010056	4873	Dlx5	tan	JA-Mod-14
ARC	0.116	0.1709	0.0575	NM_018790	25405	Arc	tan	JA-Mod-14
HCRT	0.526	0.9393	0.0722	NM_010410	10096	Hcrt	tan	JA-Mod-14
KIFC3	1.51	2.0365	1.0015	NM_010631	22513	Kifc3	tan	JA-Mod-14
CETN3	0.94	0.4713	1.4388	NM_007684	12481	Cetn3	tan	JA-Mod-14
CMPK2	1.88	1.2428	2.4183	L32973	1676	Tyki	tan	JA-Mod-14
CCS	0.777	0.4993	1.05	NM_016892	21414	Ccsd	tan	JA-Mod-14
GAPDH	1.21	1.6093	0.846	NM_008084	5289	Gapd	tan	JA-Mod-14
pmch	0.474	0.8242	0.2106	AK020723	200361	A230109K23Rik	tan	JA-Mod-14
ZCCHC12	0.572	0.4867	0.6474	AK012833	41601	2810028A01Rik	tan	JA-Mod-14
SLC25A3	3.09	0.9073	0.9541	BC018161	298		turquoise	JA-Mod-15
MRFAP1	3.86	0.9765	0.8887	NM_026242	391	9130413I22Rik	turquoise	JA-Mod-15
abl1	3.01	1.2025	0.9824	J02995	1318	Abl1	turquoise	JA-Mod-15
SHFM1	0.495	1.0188	1.0992	NM_009169	2469	Shfdg1	turquoise	JA-Mod-15
CNTN1	3.37	2.0905	2.0627	NM_007727	4911	Cntn1	turquoise	JA-Mod-15
PTPRG	2.02	1.2256	1.2262	NM_008981	9010	Ptprg	turquoise	JA-Mod-15
CHST2	2.62	1.1851	0.9776	NM_018763	12968	Chst2	turquoise	JA-Mod-15
ATP2B2	1.27	2.1584	2.1232	NM_009723	20441	Atp2b2	turquoise	JA-Mod-15
MPHOSPH8	3.67	1.2561	1.3359	NM_023773	27160	4930548G07Rik	turquoise	JA-Mod-15
SCN1B	2.1	1.0106	0.9134	NM_011322	1418	Scn1b	turquoise	JA-Mod-15
MAPK8IP1	2.61	1.0523	1.0852	NM_011162	2720	Prkm8ip	turquoise	JA-Mod-15
CAPZA2	2.07	1.1972	1.1973	NM_007604	3529	Cappa2	turquoise	JA-Mod-15
SYT1	2.38	1.0465	1.0605	NM_009306	5101	Syt1	turquoise	JA-Mod-15
PAM	2.53	0.5831	0.5074	NM_013626	5121	Pam	turquoise	JA-Mod-15
TWSG1	2.07	0.9843	1.0704	NM_023053	10153	Twg-pending	turquoise	JA-Mod-15
PEX11B	1.77	0.5702	0.4125	NM_011069	20901	Pex11b	turquoise	JA-Mod-15
1200015M12Rik	2.66	1.0579	0.9861	AK004796	22482	1200015M12Rik	turquoise	JA-Mod-15
DCAF6	2.29	1.2868	1.0752	AK004618	24072	1200006M05Rik	turquoise	JA-Mod-15
FAM114A2	2.61	0.7166	0.9669	AK018570	25632	9030624B09Rik	turquoise	JA-Mod-15
KLHL2	2.45	1.1548	1.2236	AK020050	27412	Klhl2	turquoise	JA-Mod-15
PRPS1	0.451	1.0876	1.0838	NM_021463	27454	Prps1	turquoise	JA-Mod-15
GPX4	2.47	1.0729	0.9928	NM_008162	2400	Gpx4	turquoise	JA-Mod-15
Nsg2	3.01	0.8776	0.9738	NM_008741	3304	Nsg2	turquoise	JA-Mod-15
AATK	2.8	1.1172	0.9045	NM_007377	6826	Aatk	turquoise	JA-Mod-15
HIPK1	2.66	0.788	0.961	AF071070	20827	Hipk1	turquoise	JA-Mod-15
IP6K1	2.72	1.0813	0.9079	AK004808	22360	1200016D08Rik	turquoise	JA-Mod-15
IGFBP5	3.22	1.2742	1.2385	L12447	578	Igfbp5	turquoise	JA-Mod-15
SACM1L	0.455	1.238	1.1853	NM_030692	796	Sacm1l	turquoise	JA-Mod-15
ARF4	2.37	0.8802	0.8035	NM_007479	1486	Arf4	turquoise	JA-Mod-15
PLGRKT	0.486	1.0672	1.1041	AK017215	3561	5033414D02Rik	turquoise	JA-Mod-15
SPTBN2	2.53	1.0043	1.0235	AF026489	7363	Spnb3	turquoise	JA-Mod-15
ATP9A	2.58	0.64	0.7337	NM_015731	10288	Atp9a	turquoise	JA-Mod-15
SLC2A1	2.11	0.9675	1.0256	M23384	21002	Slc2a1	turquoise	JA-Mod-15
GOLPH3	2.96	0.976	1.2356	NM_025673	22435	Golph3	turquoise	JA-Mod-15
LANCL2	2.15	0.9267	1.0963	AB035967	25888	1700003F10Rik	turquoise	JA-Mod-15
PLPP3	2	1.0883	1.1936	AK003390	27363	1110003O22Rik	turquoise	JA-Mod-15
MAP2K4	2.87	1.3265	1.3078	U18310	27491	Map2k4	turquoise	JA-Mod-15
SIL1	0.272	1.2046	1.1555	NM_030749	28238	Sil1-pending	turquoise	JA-Mod-15
B2M	0.306	0.5714	0.5924	NM_009735	163	B2m	turquoise	JA-Mod-15
SGCE	0.391	0.868	0.9545	NM_011360	8739	Sgce	turquoise	JA-Mod-15
NEDD4	2.76	0.7268	0.8973	U96635	16553	Nedd4a	turquoise	JA-Mod-15
LIMD2	3.2	1.1939	0.9332	AK012581	21687	0610025L06Rik	turquoise	JA-Mod-15
CAPN7	2.32	1.0736	1.1774	NM_009796	24778	Capn7	turquoise	JA-Mod-15
RNF113A2	0.46	0.8915	0.8748	AK009420	24846	2310020H19Rik	turquoise	JA-Mod-15
RACK1	2.1	1.1107	1.0792	NM_008143	5305	Gnb2-rs1	turquoise	JA-Mod-15
PRDX4	0.422	1.3039	1.2495	NM_016764	19127	Prdx4	turquoise	JA-Mod-15
S100A8	0.397	0.622	0.6501	NM_013650	21567	S100a8	turquoise	JA-Mod-15
Pon2	2.31	0.8852	0.7869	NM_008896	22681	Pon2	turquoise	JA-Mod-15
H1F0	2.87	0.9478	1.0589	NM_008197	24350	H1f0	turquoise	JA-Mod-15
PGD	1.34	0.4637	0.5032	BC011329	24365	0610042A05Rik	turquoise	JA-Mod-15
PPP3CB	3.18	1.3276	1.2662	M81483	24381	Ppp3cb	turquoise	JA-Mod-15
VPS4A	2.41	0.8772	0.88	BC018368	24437	Vps4a	turquoise	JA-Mod-15
ITGAV	2.17	0.9586	0.948	AK003416	227	1110004F14Rik	turquoise	JA-Mod-15
CHRNG	0.262	0.9931	1.0332	NM_009604	2810	Chrng	turquoise	JA-Mod-15
PRPF8	2.31	0.7616	0.8709	AB047391	3757	AU019467	turquoise	JA-Mod-15
SORL1	0.474	1.6311	1.621	AF031816	5396	Sorl1	turquoise	JA-Mod-15
TEF	3.8	0.8134	0.9919	BC017689	19258	2310028D20Rik	turquoise	JA-Mod-15
ABCF2	2.22	1.1039	1.1556	BC003300	21629	Abcf2	turquoise	JA-Mod-15
CCNI	2.33	1.0981	1.0386	NM_017367	22711	Ccni	turquoise	JA-Mod-15
PRL	0.0181	0.0054	0.0051	NM_011164	1270	Prl	turquoise	JA-Mod-15
CX3CL1	2.6	0.8656	0.9514	NM_009142	3205	Scyd1	turquoise	JA-Mod-15
CNIH1	2.2	0.7961	0.9422	AK011200	3261	Cnih	turquoise	JA-Mod-15
NMB	0.329	0.766	0.8304	NM_026523	22246	3110023K12Rik	turquoise	JA-Mod-15
ODF2L	0.483	0.9505	0.9648	NM_025714	25030	4733401D09Rik	turquoise	JA-Mod-15
GFM1	0.467	1.1328	1.1896	BC013093	27288	Gfm	turquoise	JA-Mod-15
NRAS	2.19	0.8638	1.0245	NM_010937	734	Nras	turquoise	JA-Mod-15
SLC16A2	2.52	1.2883	1.0635	NM_009197	5045	Slc16a2	turquoise	JA-Mod-15
PPP2CB	2.1	1.185	1.1662	NM_017374	7418	Ppp2cb	turquoise	JA-Mod-15
TNFAIP1	2.44	1.079	0.9047	AK004593	10331	Tnfaip1	turquoise	JA-Mod-15
WDR48	2.76	1.1897	1.028	BC006679	27339	5430411C10Rik	turquoise	JA-Mod-15
NR3C1	2.6	1.245	1.226	NM_008173	4918	Nr3c1	turquoise	JA-Mod-15
HCCS	2.01	1.1569	1.0507	NM_008222	10001	Hccs	turquoise	JA-Mod-15
1110008L16Rik	0.425	1.2052	1.2761	AK003589	25489	1110008L16Rik	turquoise	JA-Mod-15
AF374476	2.51	1.2823	1.1926	AF374476	27320		turquoise	JA-Mod-15
NTSR2	2.31	1.4603	1.4291	NM_008747	5153	Ntsr2	turquoise	JA-Mod-15
KLHL5	2.12	1.1905	1.2309	AK004982	10281	1300013C10Rik	turquoise	JA-Mod-15
BIRC2	2.01	1.0856	1.1336	NM_007465	14483	Birc3	turquoise	JA-Mod-15
TMEM68	2.21	0.8911	0.6397	AK008493	24229	2010300G19Rik	turquoise	JA-Mod-15
Ndr1	2.05	0.9187	0.9378	NM_010884	4063	Ndr1	turquoise	JA-Mod-15
ACKR1	2.64	0.7649	0.7083	NM_010045	6393	Dfy	turquoise	JA-Mod-15
FKBP4	0.454	0.7424	0.731	NM_010219	12758	Fkbp4	turquoise	JA-Mod-15
SEC61B	0.454	0.945	0.9345	NM_024171	20188	1190006C12Rik	turquoise	JA-Mod-15
CRAT	2.39	1.2379	1.1012	NM_007760	20396	Crat	turquoise	JA-Mod-15
CAB39	2.24	1.4247	1.2644	BC020041	21684	Cab39	turquoise	JA-Mod-15
ATP6AP1	2.24	1.2301	1.0433	NM_018794	21961	Atp6s1	turquoise	JA-Mod-15
TNKS2	2.9	1.3199	1.0597	AK017383	23207	5430432P15Rik	turquoise	JA-Mod-15
CXCL10	4.76	0.5779	1.1699	NM_021274	877	Scyb10	turquoise	JA-Mod-15
RCN2	2.79	0.9923	1.2323	NM_011992	1782	Rcn2	turquoise	JA-Mod-15
NDUFAF1	0.494	1.0258	0.9811	BC018422	5545	2410001M24Rik	turquoise	JA-Mod-15
AP3M2	2.69	0.7149	0.8676	NM_029505	10647	Ap3m2	turquoise	JA-Mod-15
H2-Ke6	0.442	1.0199	0.9389	NM_013543	15479	H2-Ke6	turquoise	JA-Mod-15
SEZ6	2.05	1.0603	0.909	NM_021286	4727	Sez6	turquoise	JA-Mod-15
TMBIM6	1.47	0.4817	0.5927	BC005588	16769	5031406P05Rik	turquoise	JA-Mod-15
CRADD	0.484	0.8206	0.8024	NM_009950	17493	Cradd	turquoise	JA-Mod-15
Uqcrc1	2.87	0.6781	0.9384	BC017687	972	Uqcrc1	turquoise	JA-Mod-15
S1PR1	2.63	0.5882	0.6775	AK004591	982	Edg1	turquoise	JA-Mod-15
MFSD14B	2.26	1.289	1.2798	BC018395	2862	5730414C17Rik	turquoise	JA-Mod-15
SLC6A1	2.18	1.251	1.0836	M92378	5260	Gabt1	turquoise	JA-Mod-15
AHCYL1	2.91	1.0815	1.1458	AK004088	27733	1110034F20Rik	turquoise	JA-Mod-15
SPARC	2.29	0.9916	0.8598	NM_009242	35439	Sparc	turquoise	JA-Mod-15
MAL	2.17	1.3168	1.2809	NM_010762	39040	Mal	turquoise	JA-Mod-15
HP1BP3	3	0.9116	0.8211	BC020024	29822	Hp1bp3	turquoise	JA-Mod-15
DNAJB2	2.06	1.0661	0.9544	NM_020266	103605	Dnajb10	turquoise	JA-Mod-15
ABRACL	0.431	0.8656	0.9238	AK013984	28149	3110003A17Rik	turquoise	JA-Mod-15
ATP6V1A	2.26	1.0166	1.1461	NM_007508	29771	Atp6a1	turquoise	JA-Mod-15
SH3PXD2A	2.03	1.2809	1.2761	AK009333	29777	2310014D11Rik	turquoise	JA-Mod-15
1700080G18Rik	0.464	1.2288	1.2216	AK006956	139249	1700080G18Rik	turquoise	JA-Mod-15
Tmem181a	2.85	1.0982	1.0021	AK020034	139787	5930418K15Rik	turquoise	JA-Mod-15
PITHD1	2.5	0.9371	0.8007	AK004208	29131	1110049F12Rik	turquoise	JA-Mod-15
WASH1	2.49	0.8467	1.0444	AJ304796	39990	1110049F14Rik	turquoise	JA-Mod-15
C2CD5	2.3	0.7749	0.8111	AK017577	130260	5730419I09Rik	turquoise	JA-Mod-15
COX7B	2	1.0819	0.922	NM_025379	142188	Cox7b	turquoise	JA-Mod-15
Zfp740	2.13	0.9959	1.1275	AK004098	154153	1110034O07Rik	turquoise	JA-Mod-15
TMEM47	2.11	0.8016	0.8841	AB041540	154610		turquoise	JA-Mod-15
FBXO33	0.454	0.72	0.7583	BC020022	40299	5730501N20Rik	turquoise	JA-Mod-15
MECP2	2.12	1.0706	1.0477	NM_010788	40984	Mecp2	turquoise	JA-Mod-15
GLRB	2.07	1.086	1.026	NM_010298	29422	Glrb	turquoise	JA-Mod-15
STMN1	2.19	1.0838	1.1793	NM_019641	28479	Lag	turquoise	JA-Mod-15
CUTA	2.23	1.0157	0.8737	BC021463	29372	0610039D01Rik	turquoise	JA-Mod-15
DNAJC14	2.65	0.9487	1.0103	BC011146	34357	5730551F12Rik	turquoise	JA-Mod-15
CDIPT	2.23	0.7772	0.7561	BC021473	28219		turquoise	JA-Mod-15
RGS2	0.741	0.4712	0.4356	NM_009061	28262	Rgs2	turquoise	JA-Mod-15
EMC3	2.84	0.9845	0.9707	BC004641	28312	0610039A15Rik	turquoise	JA-Mod-15
ADD1	2.4	1.058	0.9318	NM_013457	29052	Add1	turquoise	JA-Mod-15
2900097C17Rik	4.03	0.8561	1.1283	AK007344	29909	1810005K14Rik	turquoise	JA-Mod-15
MAT2B	2.02	1.0632	0.8887	BC003457	28848	AU022853	turquoise	JA-Mod-15
ADGRL1	2.29	0.9992	1.087	AK013763	29638	2900070I05Rik	turquoise	JA-Mod-15
OCIAD2	0.44	0.8749	0.8972	AK007617	38806	1810027I20Rik	turquoise	JA-Mod-15
PPIH	0.491	1.1105	1.2233	AK005202	140686	1100001J08Rik	turquoise	JA-Mod-15
CNNM1	2.01	1.2593	1.1822	NM_031396	39388	Cnnm1	turquoise	JA-Mod-15
FNDC4	2.02	0.9253	1.0193	AK018154	40009	2810430J06Rik	turquoise	JA-Mod-15
CDH10	0.451	1.3441	1.4154	AF183946	40247	Cdh10	turquoise	JA-Mod-15
CYB561	2.29	0.5821	0.7101	BC006732	154456	Cyb561	turquoise	JA-Mod-15
RFC1	2.06	1.0624	1.1663	NM_011258	148877	Recc1	turquoise	JA-Mod-15
SLC25A11	2.06	0.9434	0.9526	BC019631	28466	Slc25a11	turquoise	JA-Mod-15
FAM192A	0.452	1.0668	1.1793	BC016088	29348	AI596259	turquoise	JA-Mod-15
NAT8	0.451	0.8414	0.8117	NM_023455	154782	Cml4	turquoise	JA-Mod-15
BET1L	2.4	1.0566	0.959	AK011508	155696	Bet1l	turquoise	JA-Mod-15
RPL31	0.443	0.7333	0.7745	NM_053257	29982	Rpl31	turquoise	JA-Mod-15
NTM	2.83	1.0769	1.2004	AK018085	131127	6230410L23Rik	turquoise	JA-Mod-15
RBBP5	2.12	0.8781	0.9249	AK016773	132868	4933411J24Rik	turquoise	JA-Mod-15
SPAG9	2.02	1.2615	1.1043	AK014638	168786	Spag9	turquoise	JA-Mod-15
KIF21A	2.17	1.1253	1.0045	NM_016705	41379	Kif21a	turquoise	JA-Mod-15
PLCB1	2.07	0.8082	0.8607	NM_019677	42083	Plcb1	turquoise	JA-Mod-15
KDM2B	2.34	0.9916	1.031	AF176524	86406	Fbxl10	turquoise	JA-Mod-15
SVIP	2.76	1.097	1.2064	AK018351	41279	6620401M08Rik	turquoise	JA-Mod-15
dusp28	3.13	0.9218	0.7981	AK002934	46179	0710001B24Rik	turquoise	JA-Mod-15
CCNL1	0.43	0.8802	0.8479	BC007177	175612	Ccnl	turquoise	JA-Mod-15
FAM213B	0.49	0.9691	0.9556	NM_025582	41868	2810405K02Rik	turquoise	JA-Mod-15
Ube2d-ps	2.68	1.0911	0.953	AK005556	46374	1600028I17Rik	turquoise	JA-Mod-15
UBR3	2.16	1.0586	0.9008	AK014747	195861	4833421P10Rik	turquoise	JA-Mod-15
Zfp260	2.25	1.4761	1.4297	D45210	200569	Zfp260	turquoise	JA-Mod-15
RDM1	1.48	2.4669	2.5228	NM_025654	41449	2410008M22Rik	turquoise	JA-Mod-15
EGR4	0.311	0.1843	0.1728	NM_020596	44137	Egr4	turquoise	JA-Mod-15
CBX6	2.89	1.0778	1.0932	AK017510	180587	5730406O18Rik	turquoise	JA-Mod-15
EGR1	0.532	0.1455	0.1945	M22326	181959	Egr1	turquoise	JA-Mod-15
TMEM25	2.2	1.3922	1.2573	AK002841	41409	0610039J01Rik	turquoise	JA-Mod-15
ARL8A	2.01	0.8599	0.9579	BC018479	174998	1110033P22Rik	turquoise	JA-Mod-15
TXNRD2	0.489	0.8925	0.9443	AK008004	176422		turquoise	JA-Mod-15
TRIM2	2.78	1.1432	1.3355	NM_030706	44876	Trim2	turquoise	JA-Mod-15
NTS	0.562	0.4978	0.4973	NM_024435	64201	5033428E16Rik	turquoise	JA-Mod-15
5033430I15Rik	0.396	0.9442	0.9269	AK017206	44949	5033430I15Rik	turquoise	JA-Mod-15
TAF1D	0.46	0.9259	0.9287	AK014920	200595	5930426I11Rik	turquoise	JA-Mod-15
TTC9B	2.26	1.0509	1.1241	AK013779	44095	2900074C18Rik	turquoise	JA-Mod-15
SNAP91	2.03	1.2441	0.9285	NM_013669	4870	Snap91	yellow	JA-Mod-16
NLK	0.421	1.1572	1.5545	NM_008702	9001	Nlk	yellow	JA-Mod-16
RNF14	2.33	1.4395	1.2037	NM_020012	22086	Rnf14	yellow	JA-Mod-16
ANKRA2	1.2	0.7245	0.4942	NM_023472	27228	Ankra2	yellow	JA-Mod-16
MFGE8	2.74	1.5374	1.0871	NM_008594	1451	Mfge8	yellow	JA-Mod-16
EPOR	0.461	0.8278	1.0158	NM_010149	2653	Epor	yellow	JA-Mod-16
GNG11	0.387	0.7934	0.9534	NM_025331	25547	0610037B21Rik	yellow	JA-Mod-16
PSAP	2.44	1.3886	1.0102	NM_011179	3363	Psap	yellow	JA-Mod-16
2210013O21Rik	0.436	0.7133	0.7951	AK008724	20883	2210013O21Rik	yellow	JA-Mod-16
OAZ2	2.07	1.1846	0.9694	D78643	675	Oaz2	yellow	JA-Mod-16
GPX3	0.964	0.585	0.4198	NM_008161	7156	Gpx3	yellow	JA-Mod-16
HIGD1A	0.491	0.7012	0.7548	AK008756	7381	Hig1-pending	yellow	JA-Mod-16
MFSD14A	2.36	1.3463	1.074	NM_008246	3792	Hiat1	yellow	JA-Mod-16
Cyp4f14	0.136	0.5836	0.7072	NM_022434	10976	Cyp4f14	yellow	JA-Mod-16
DNAJC15	0.435	0.9369	1.102	NM_025384	27692	1110003P16Rik	yellow	JA-Mod-16
PRPSAP2	2.24	1.367	1.1254	BC023178	27703		yellow	JA-Mod-16
SEC61G	0.446	0.7649	0.9352	NM_011343	1164	Sec61g	yellow	JA-Mod-16
PTGS2	0.283	0.2591	0.2468	NM_011198	3137	Ptgs2	yellow	JA-Mod-16
STX8	0.462	0.9554	1.0861	NM_018768	3973	Stx8	yellow	JA-Mod-16
Kitl	0.497	0.9807	1.1794	NM_013598	4235	Kitl	yellow	JA-Mod-16
RHOB	2.14	1.1986	0.9611	BC018275	687	Arhb	yellow	JA-Mod-16
SGF29	0.397	0.8698	0.9854	AK006287	24002	1700023O11Rik	yellow	JA-Mod-16
PXDN	2.77	1.1747	0.7805	AK010185	27386	2310075M15Rik	yellow	JA-Mod-16
SLC25A23	2.26	1.1735	0.861	NM_025877	23720	2310067G05Rik	yellow	JA-Mod-16
NCKAP1	2.01	1.3576	1.095	X61453	25203	Nckap1	yellow	JA-Mod-16
2610005L07Rik	0.387	0.6927	0.7672	BC007164	1571	2610005L07Rik	yellow	JA-Mod-16
ABHD8	2.22	1.1812	0.8966	NM_022419	22637	0910001L24Rik	yellow	JA-Mod-16
JCHAIN	0.403	0.6928	0.8238	BC006026	1192	Igj	yellow	JA-Mod-16
pcsk2	0.467	0.9029	1.0039	NM_008792	1247	Pcsk2	yellow	JA-Mod-16
FER	2.1	1.5061	1.3581	NM_008000	5175	Fert2	yellow	JA-Mod-16
AVP	0.901	0.5816	0.4829	NM_009732	6190	Avp	yellow	JA-Mod-16
PANK1	2	1.4964	1.2529	NM_023792	24742	5430426F23Rik	yellow	JA-Mod-16
CHL1	0.604	2.5106	3.1855	NM_007697	1736	Chl1	yellow	JA-Mod-16
TMED3	2.24	1.26	1.0361	NM_025360	27606	1200002G13Rik	yellow	JA-Mod-16
EPN2	2.12	1.2103	0.9249	AF057286	139695	Epn2	yellow	JA-Mod-16
PDE10A	2.25	1.3908	1.1575	NM_011866	40124	Pde10a	yellow	JA-Mod-16
Zfp566	0.46	0.8843	1.0978	AK012367	158842	2700043M03Rik	yellow	JA-Mod-16
ZCCHC7	0.364	0.5997	0.6627	AK013175	28207	D4Wsu132e	yellow	JA-Mod-16
TMEM234	0.423	0.7953	0.9095	AK005111	35837	1500002D11Rik	yellow	JA-Mod-16
Gas5	0.462	0.7864	0.9034	NM_013525	35844	Gas5	yellow	JA-Mod-16
WDR20	2.01	1.297	1.0476	NM_027149	140948	2310040A13Rik	yellow	JA-Mod-16
DPP8	2.25	1.2551	0.9891	AK009140	28660	2310004I03Rik	yellow	JA-Mod-16
CABLES1	2.37	1.2718	0.9232	NM_022021	40717	Cables	yellow	JA-Mod-16
KCNJ9	2.34	1.119	0.8189	AK007011	39529	1700085N21Rik	yellow	JA-Mod-16
OPA1	2.2	1.3211	0.8961	AB044138	31402	1200011N24Rik	yellow	JA-Mod-16
TPPP	2.39	1.2456	0.9097	AK013631	39752	2900041A09Rik	yellow	JA-Mod-16
2300002D11Rik	2.01	1.0868	0.8577	AK009004	29227	2300002D11Rik	yellow	JA-Mod-16
trim59	0.495	0.9362	1.1379	NM_025863	41535	2310035M22Rik	yellow	JA-Mod-16
SLC17A6	0.431	0.7546	0.8877	AK013772	65407	Slc17a6	yellow	JA-Mod-16
SEMA6C	2.16	1.2676	0.9926	NM_011351	23662	Sema6c	yellow	JA-Mod-16
RAPGEF4	2.46	1.4367	1.0582	NM_019688	196153	Cgef2-pending	yellow	JA-Mod-16
DPP8	2.22	1.3895	1.086	AK016546	202749	4932434F09Rik	yellow	JA-Mod-16
DCLK1	2.53	1.3668	0.8786	NM_019978	44752	Dcamkl1	yellow	JA-Mod-16
A930037O16Rik	0.425	0.8162	0.974	AK020941	166668	A930037O16Rik	yellow	JA-Mod-16
GPAT4	2.03	1.2972	1.0037	NM_018743	200898	LOC55933	yellow	JA-Mod-16
cklf	0.42	1.273	1.5646	AK005577	46021	1700001C14Rik	yellow	JA-Mod-16
